# Supplementary material for: Exporting Proteins Associated with Senescence Repair via Extracellular Vesicles May Be Associated with Early Pregnancy Loss
Source: MDPI journal article supplement (doi:10.3390/cells11182772), 2022-09-06

## Supplementary

**Figure S1:** The electron image of placental micro-EVs (A) and nano-EVs (B)

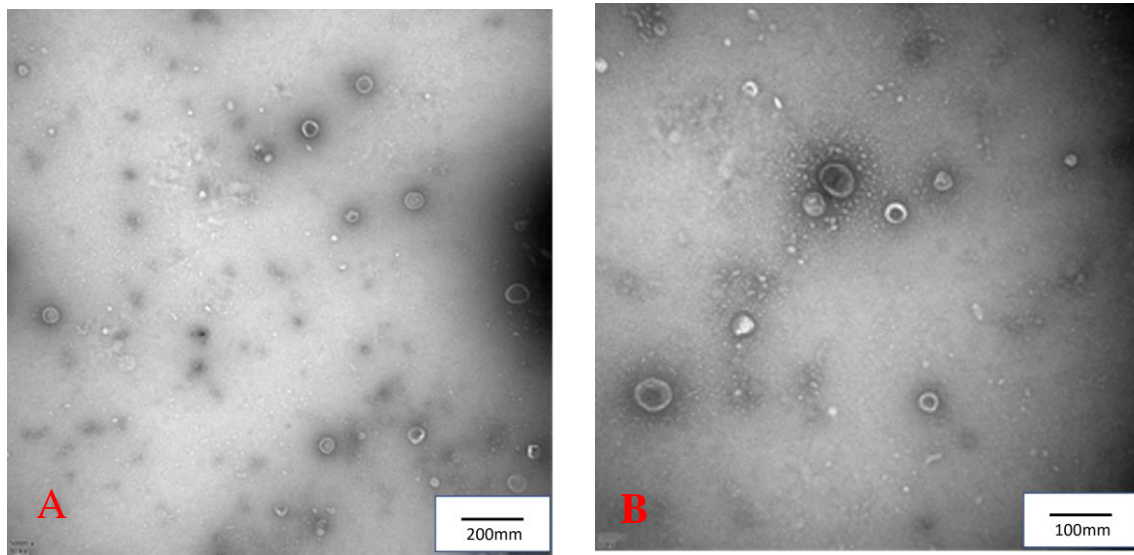

**Figure S2:** The size of micro-EVs and nano-EVs is confirmed by Nanosight NS300 (Malvern Panalytical, Almelo, The Netherlands).

### Micro-EVs

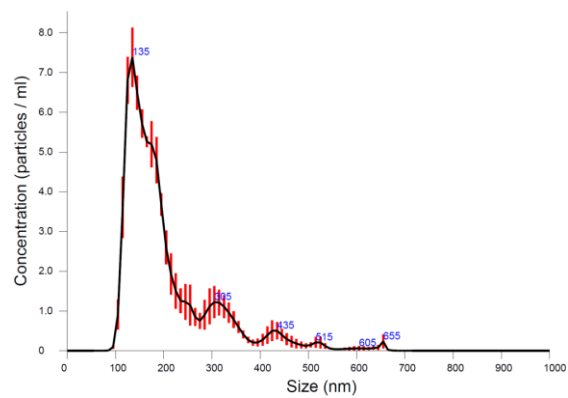

### Nano-EVs

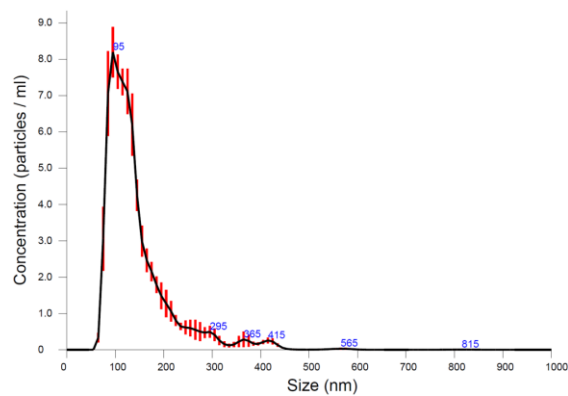

**Figure S3:** The characterisations of placental micro-EVs and nano-EVs are also confirmed by measuring EV specific surface proteins, CD81 and pan cytokeratin. No expression of vimentin in placental micro- and nano-EVs suggests the trophoblastic origin of vesicles obtained from cultured placental explants.

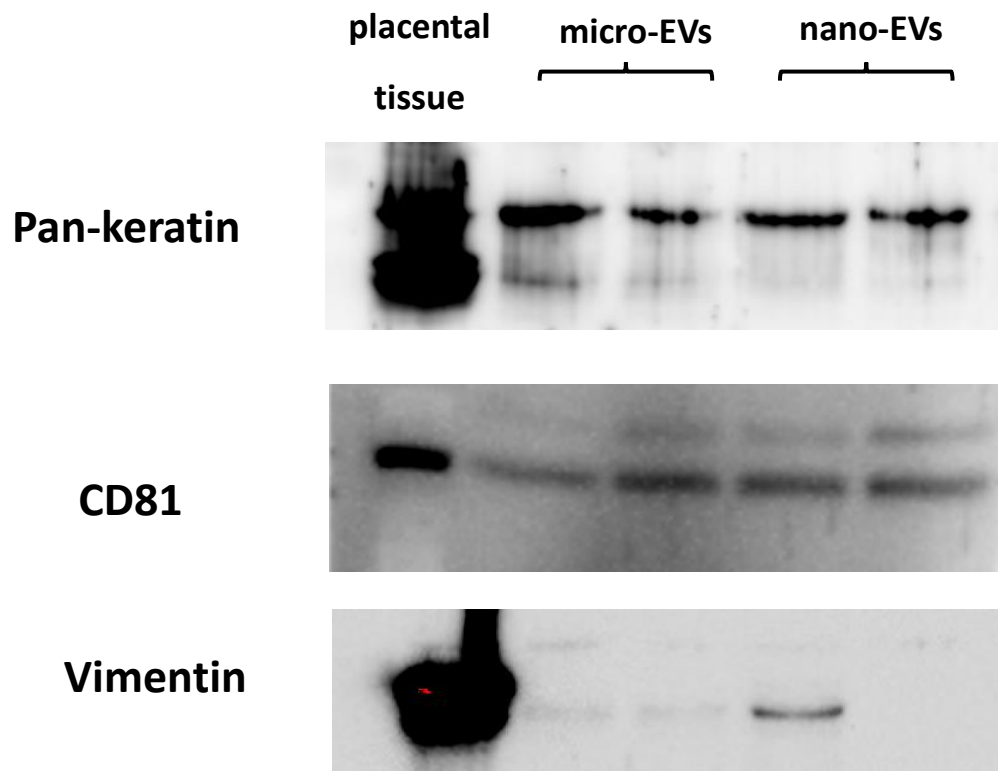

Supplement: s1 [file s1]
